# Supplementary material
Source: publisher figshare collection journal article supplement (https://gsajournals.figshare.com/articles/dataset/_/11234654)
Supplement: Supplementary file 1 [file 1]

Additional File 5

Table S1

| Construct | N-terminal domain | | | C-terminal domain | | |
| --- | --- | --- | --- | --- | --- | --- |
|  | Template | Primers | Fragment Name | Template | Primers | FragmentName |
| Chimera I | pREP3X-*uggt-a- c-myc* | GTAFWD  GTASPGTR | A | pREP3X-*gpt1+-c-myc* | SpGTMYCR  GTASPGTF | C |
| Chimera II | pREP3X-*uggt-b- c-myc* | GTBFWD  GTBSPGTR | B | pREP3X-*gpt1+-c-myc* | SpGTMYCR  GTBSPGTF | D |

Templates and primers used in the PCR amplification of the sequences encoding the N- -terminal domains of UGGT-a and UGGT-band C-terminal domain of *S.pombe* UGGT.

Table S2

| Construct | Templates | | Primers | |
| --- | --- | --- | --- | --- |
|  | N-terminal domain | C-terminal domain | sense | antisense |
| Chimera I | Fragment A | Fragment C | GTAFWD | SpGTMYCR |
| Chimera II | Fragment B | Fragment D | GTBFWD | SpGTMYCR |

Templates and primers used in the PCR amplification of the full length chimeric UGGTs

Table S3

| Primer name | Sequence 5’—3 |
| --- | --- |
| | GTAFWD | | --- | | GACGGTCTCGAGATGAACTTGACTGGTCTTCTTATC |
| GTAMYCREV | TCATCGGGATCCTTATAATTCATCAGGCAGATCCTCTTCTGAGATGAGTTTTTGTTCAAGTTCCGTGTGAGAGTCATCATTTTCAGAAATG |
| GTBFWD | GACGGTCTCGAGATGCGTTTAACTCATTTCCTTTTG |
| GTBMYCREV | TCATCGGGATCCTTATAATTCATCAGGCAGATCCTCTTCTGAGATGAGTTTTTGTTCTAATTCATCTCGATCCACTGATGG |
| SpGTMYCREV | TCATCGGGATCCTTATAATTCATCAGGCAGATCCTCTTCTGAGATGAGTTTTTGTTCAAGTTCGTCCGGAGATGAGTTGTTATCCTTTTCT |
| GTASpGTF | TCTTCTAAGGAAAAGACTCAAGAATCTATAAATATTTTTTCTGTTGCC |
| GTASpGTR | GGCAACAGAAAAAATATTTATAGATTCTTGAGTCTTTTCCTTAGAAGA |
| GTBSpGTF | TTTGCTTCTCCTGAACCTTCTGAATCTATAAATATTTTTTCTGTTGCC |
| GTBSpGTR | GGCAACAGAAAAAATATTTATAGATTCAGAAGGTTCAGGAGAAGCAAA |

List of DNA primers used in this work

**Supplementary Figure 3**.Expression of SpUGGT, Ce-UGGT-a, Ce-UGGT-b and chimeric proteins in *S.pombe alg6/gpt1-*cells

1 2 3 4 5 6


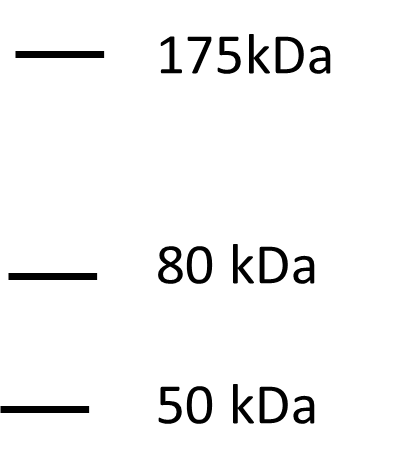

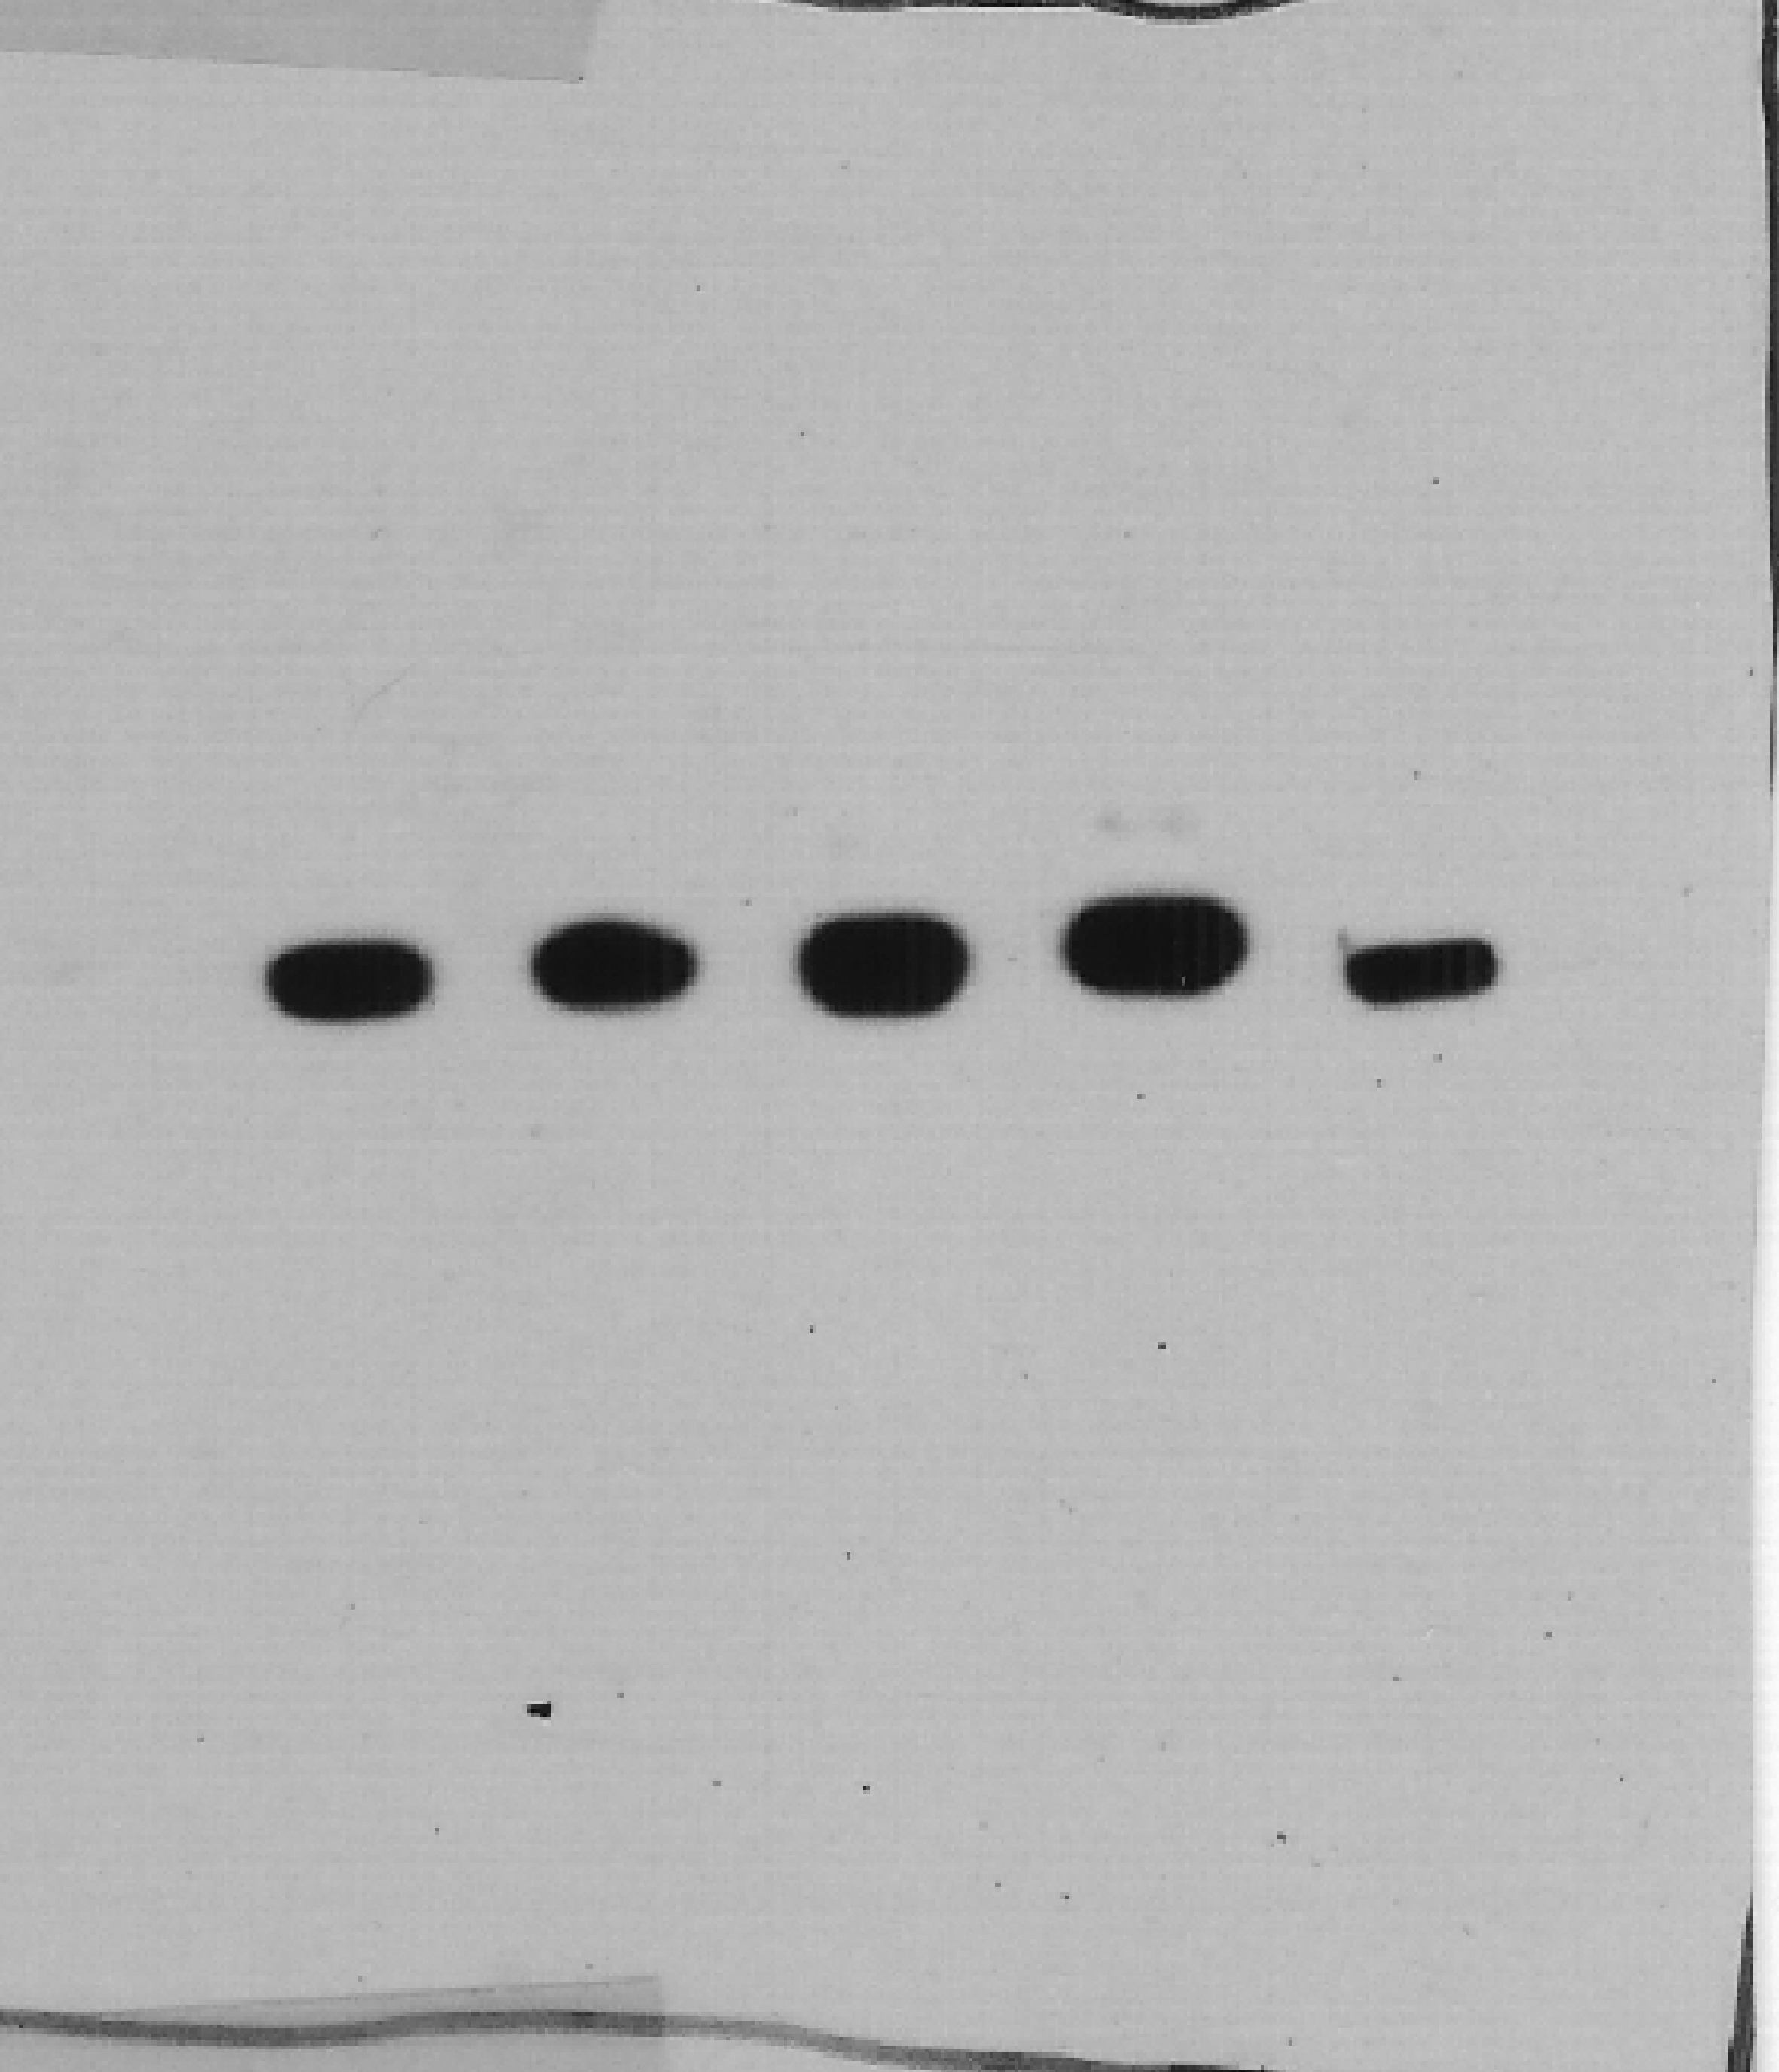


Expression of full length SpUGGT, *Ce*-UGGT-a, *Ce*-UGGT b and chimeric proteins in *S.pombe alg6/gpt1-*cells.Microsomal proteins derived of *S.pombe alg6/gpt1* transformed with pREP3X-*uggt*-b (lane1), pREP3X-*uggt*-a (lane 2), pREP3X-*gpt1+* (lane 3), pREP3X-chimera I (N-term-*uggt*-a-C-term-*gpt1+c-myc*) (lane 4),pREP3X-chimera II (N-term-*gpt1+*-C-term-*uggt*-a *c-myc*) (lane 5) and pREP3X (lane 6) were analyzed in 8 % SDS PAGE and submitted to Western-blot analysis using a commercial anti c-Myc antibody.
