# Supplementary material
Source: publisher figshare collection journal article supplement (https://gsajournals.figshare.com/articles/dataset/_/11234654)

# Vertebrates

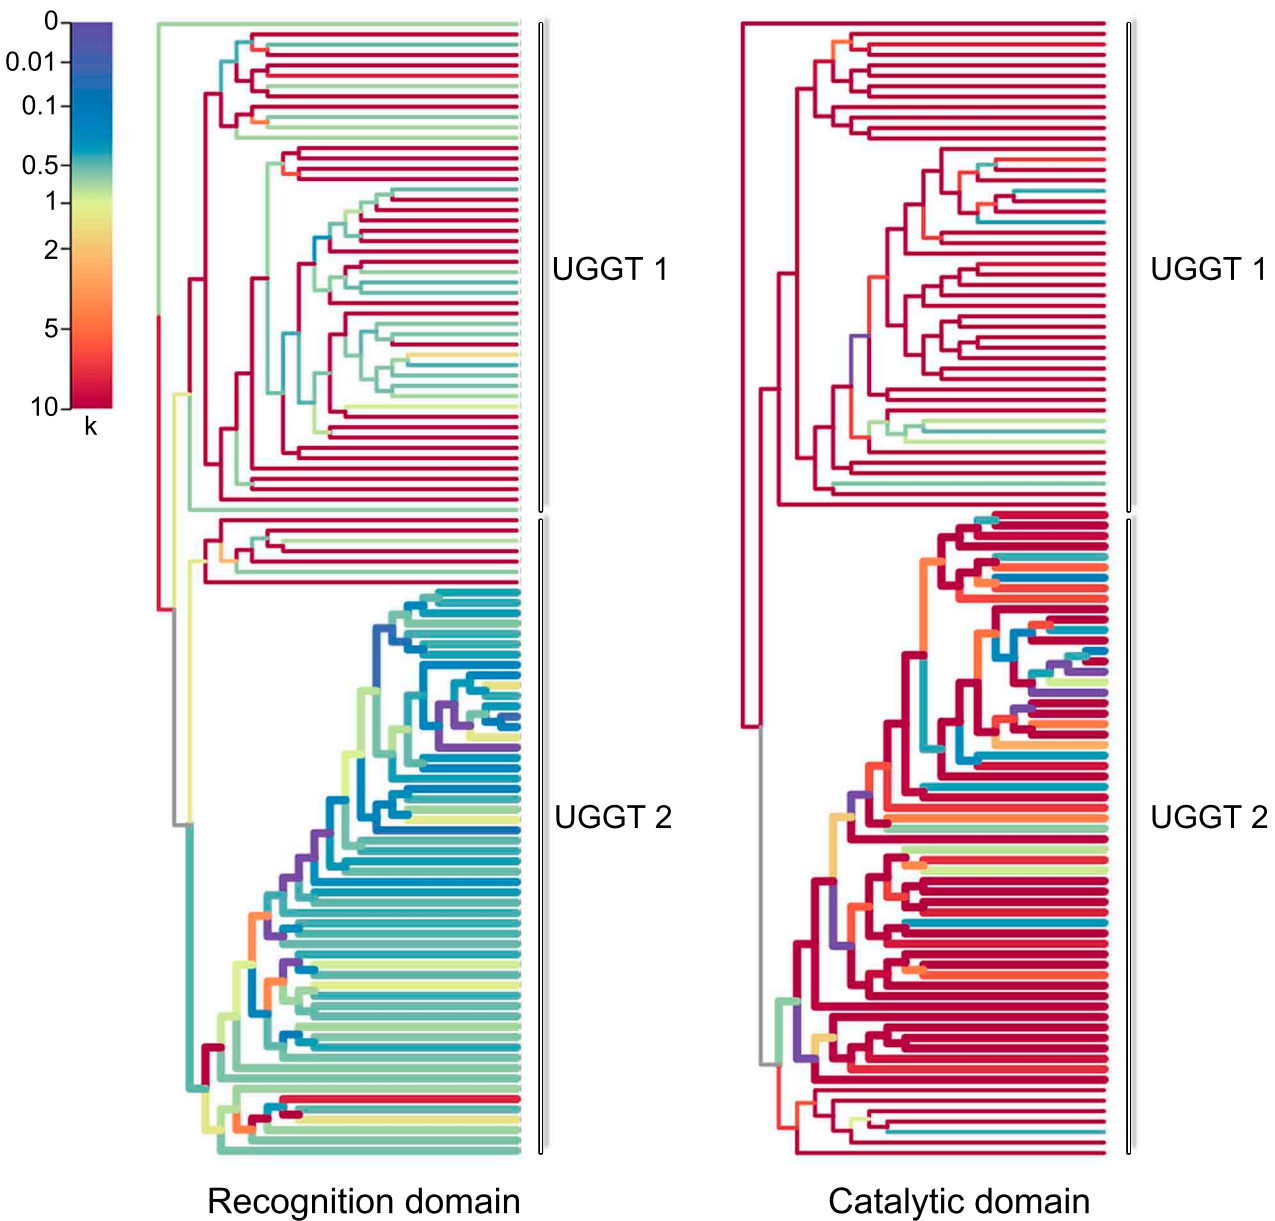

Supplement: Supplementary file 1 [file 1]
